# Supplementary material for: Extracting Cross-Sectional Clinical Images Based on Their Principal Axes of Inertia
Source: Scanning. 2017 Dec 19;2017:1468596. doi: 10.1155/2017/1468596 (PMC5749335; doi:10.1155/2017/1468596)
Supplement: Supplementary Materials — Supplementary video files: (1) r-l-a.flv video recording changes on the axial plane of the first metatarsal boundaries from the same participant's left and right foot; (2) r-l-c.flv video recording changes on the coronal plane of the first metatarsal boundaries from the same participant's left and right foot; (3) r-l-s.flv video recording changes on the sagittal plane of the first metatarsal boundaries from the same participant's left and right foot; (4) f-s-a.flv video recording changes on the axial plane of the right foot first metatarsal boundaries from the same participant's first and second time; (5) f-s-c.flv video recording changes on the coronal plane of the right foot first metatarsal boundaries from the same participant's first and second time; (6) f-s-s.flv video recording changes on the sagittal plane of the right foot first metatarsal boundaries from the same participant's first and second time. [file 1468596.f1.zip]

Archive with 6 entries (6 files):
- 1468596.f1.flv
- 1468596.f2.flv
- 1468596.f3.flv
- 1468596.f4.flv
- 1468596.f5.flv
- 1468596.f6.flv
